# Supplementary material
Source: Royal Society of Chemistry journal article supplement (doi:10.1039/d6cp00168h)
Supplement: d6cp00168h1.pdf [file d6cp00168h1.pdf]

**Pressure-induced Structural Phase Transition and Thermoelectric Properties of Bulk  
 $\text{Mg}_3\text{Bi}_2$**

Han Zhang<sup>ab</sup>, Tao Feng<sup>c</sup>, Xiaolong Gan<sup>ab</sup>, Shuoxue Jin<sup>ab</sup>, Yujun Zhang<sup>a</sup>, Jiaou Wang<sup>a</sup>, Zhiying Guo<sup>\*ab</sup>,  
Wei Xu<sup>a</sup>, and Weishu Liu<sup>c</sup>

<sup>a</sup>. Beijing Synchrotron Radiation Facility, Institute of High Energy Physics, Chinese Academy of  
Sciences, Beijing 100049, People's Republic of China

<sup>b</sup>. University of Chinese Academy of Sciences, Beijing 100042, People's Republic of China

<sup>c</sup>. Materials Science and Engineering, Southern University of Science and Technology, Shenzhen,  
Guangdong, People's Republic of China

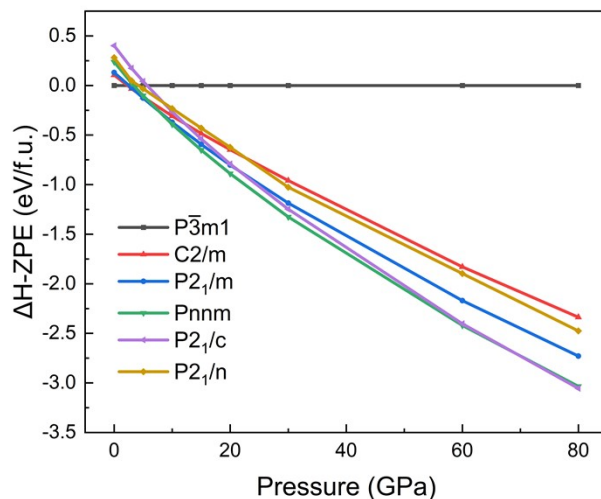

**Fig. S1** Calculated enthalpy curves as a function of pressure for each phase of  $\text{Mg}_3\text{Bi}_2$ , including zero-point energy (ZPE) correction.

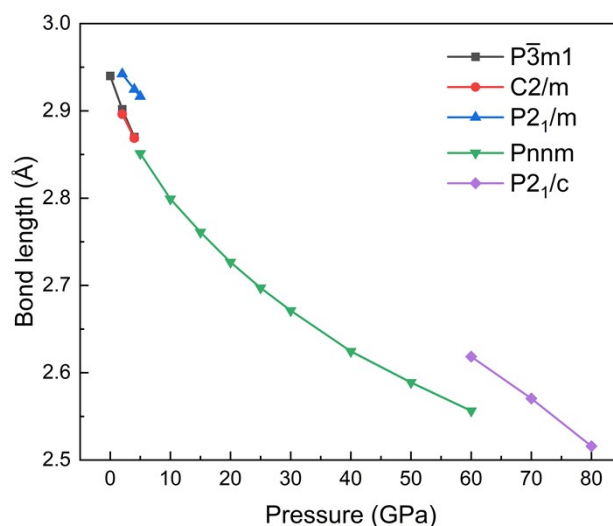

**Fig. S2** Nearest-neighbor Mg-Bi bond lengths in different phases of  $\text{Mg}_3\text{Bi}_2$ .

**Table SI.** Calculated Bader charge analysis for the  $P\bar{3}m1$ ,  $P2_1/m$ ,  $Pnnm$ , and  $P2_1/c$  phases at 0, 4, 30, and 80 GPa, respectively.  $\delta$  denotes the number of electrons transferred per atom.

| Space Group  | Atom | Charge value ( $e$ ) | $\delta$ ( $e$ ) |
|--------------|------|----------------------|------------------|
| $P\bar{3}m1$ | Mg   | 1.6444               | -0.3556          |
|              | Bi   | 15.5334              | 0.5334           |
| $P2_1/m$     | Mg   | 1.57605              | -0.42396         |
|              | Bi   | 15.63593             | 0.63593          |
| $Pnnm$       | Mg   | 1.41377              | -0.58623         |
|              | Bi   | 15.87934             | 0.87934          |
| $P2_1/c$     | Mg   | 2.28363              | 0.28363          |
|              | Bi   | 14.57456             | -0.42544         |

**Table III.** Calculated elastic constants  $C_{ij}$  (in GPa) for the  $P2_1/m$ ,  $Pnmm$ , and  $P2_1/c$  phases at 4, 30, and 80 GPa, respectively.

| Space    | $C_{11}$ | $C_{22}$ | $C_{33}$ | $C_{44}$ | $C_{55}$ | $C_{66}$ |          |
|----------|----------|----------|----------|----------|----------|----------|----------|
| Group    | $C_{12}$ | $C_{13}$ | $C_{15}$ | $C_{23}$ | $C_{25}$ | $C_{35}$ | $C_{46}$ |
| $P2_1/m$ | 85.9562  | 84.2405  | 64.8930  | 23.2191  | 15.2180  | 15.3035  |          |
|          | 38.5359  | 37.8527  | -1.8620  | 45.6931  | 2.4922   | 5.1985   | -6.4511  |
| $Pnmm$   | 225.9996 | 208.4193 | 219.5799 | 61.2096  | 35.3170  | 4.8001   |          |
|          | 102.7286 | 121.5137 | 0.0000   | 123.4532 | 0.0000   | 0.0000   | 0.0000   |
| $P2_1/c$ | 501.3339 | 442.0004 | 450.3864 | 72.3231  | 46.8994  | 33.9619  |          |
|          | 230.8434 | 205.0906 | 18.3408  | 271.3051 | -13.9276 | -11.4988 | -4.8967  |
